# Supplementary material for: Computer vision and machine learning enabled soybean root phenotyping pipeline
Source: PubMed Central journal article supplement (PMC6977263; doi:10.1186/s13007-019-0550-5), 2020-01-23

Shape captured by Fourier Descriptors

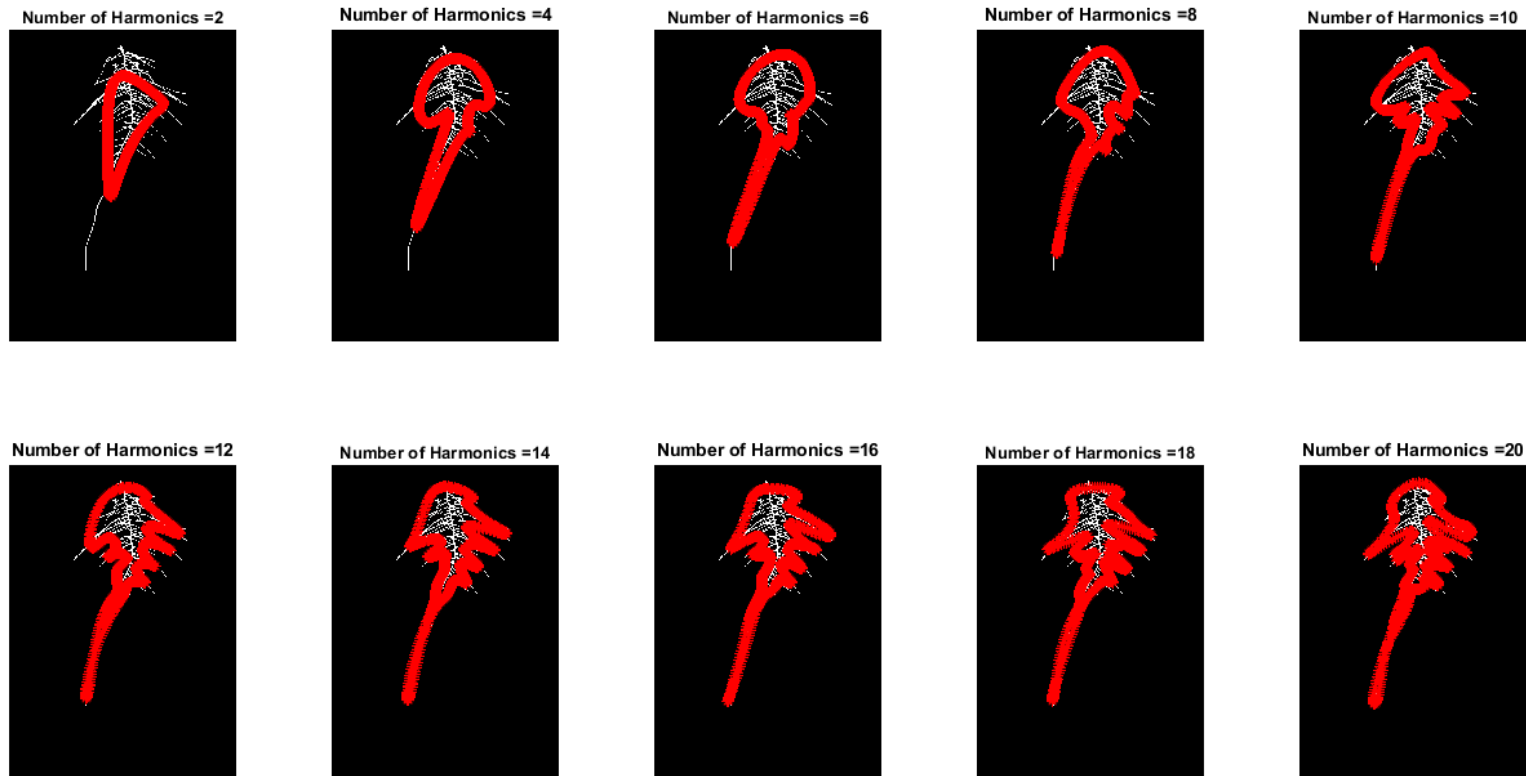

Supplementary Figure 1

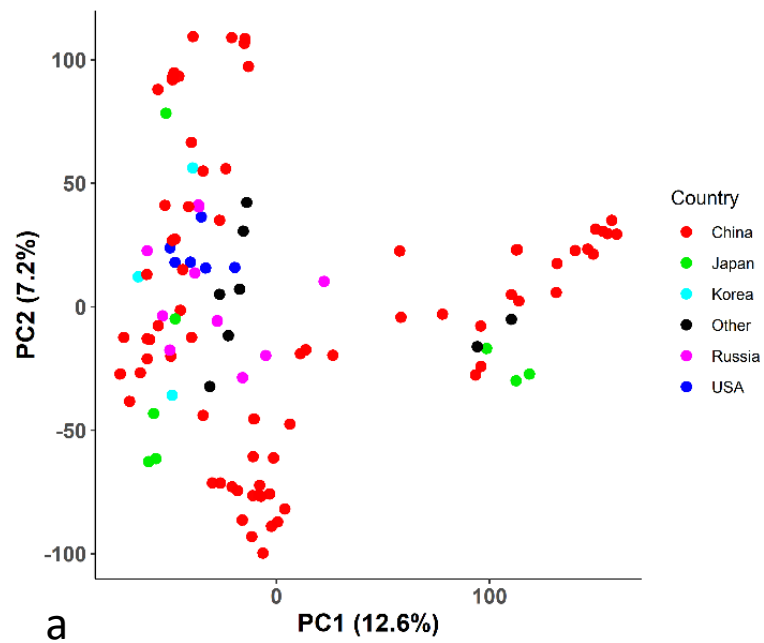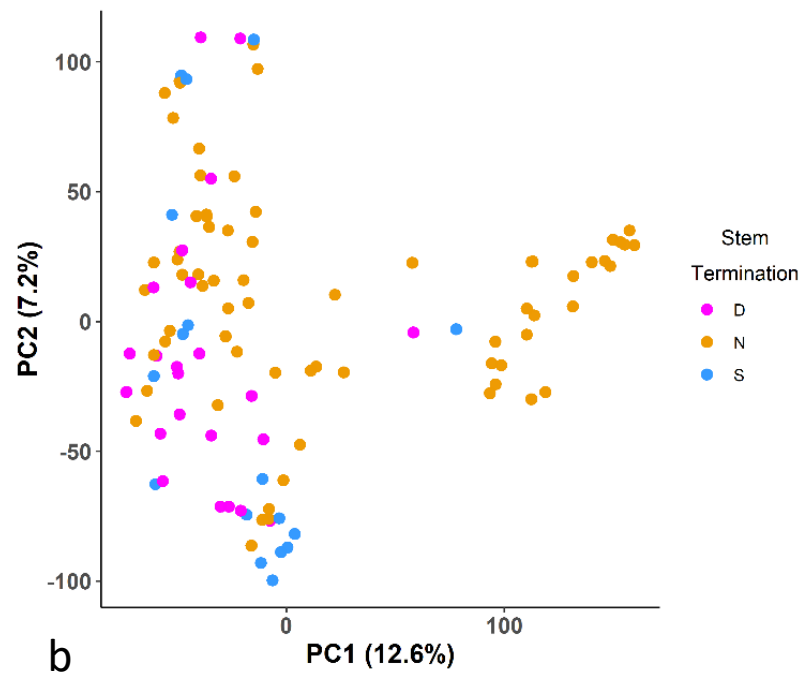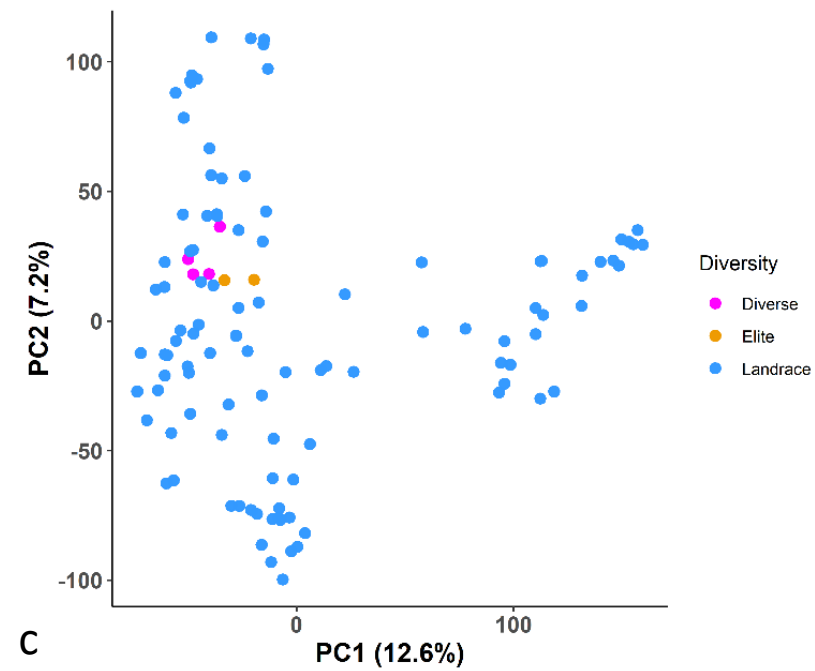

Supplementary Figure 2 a,b, c

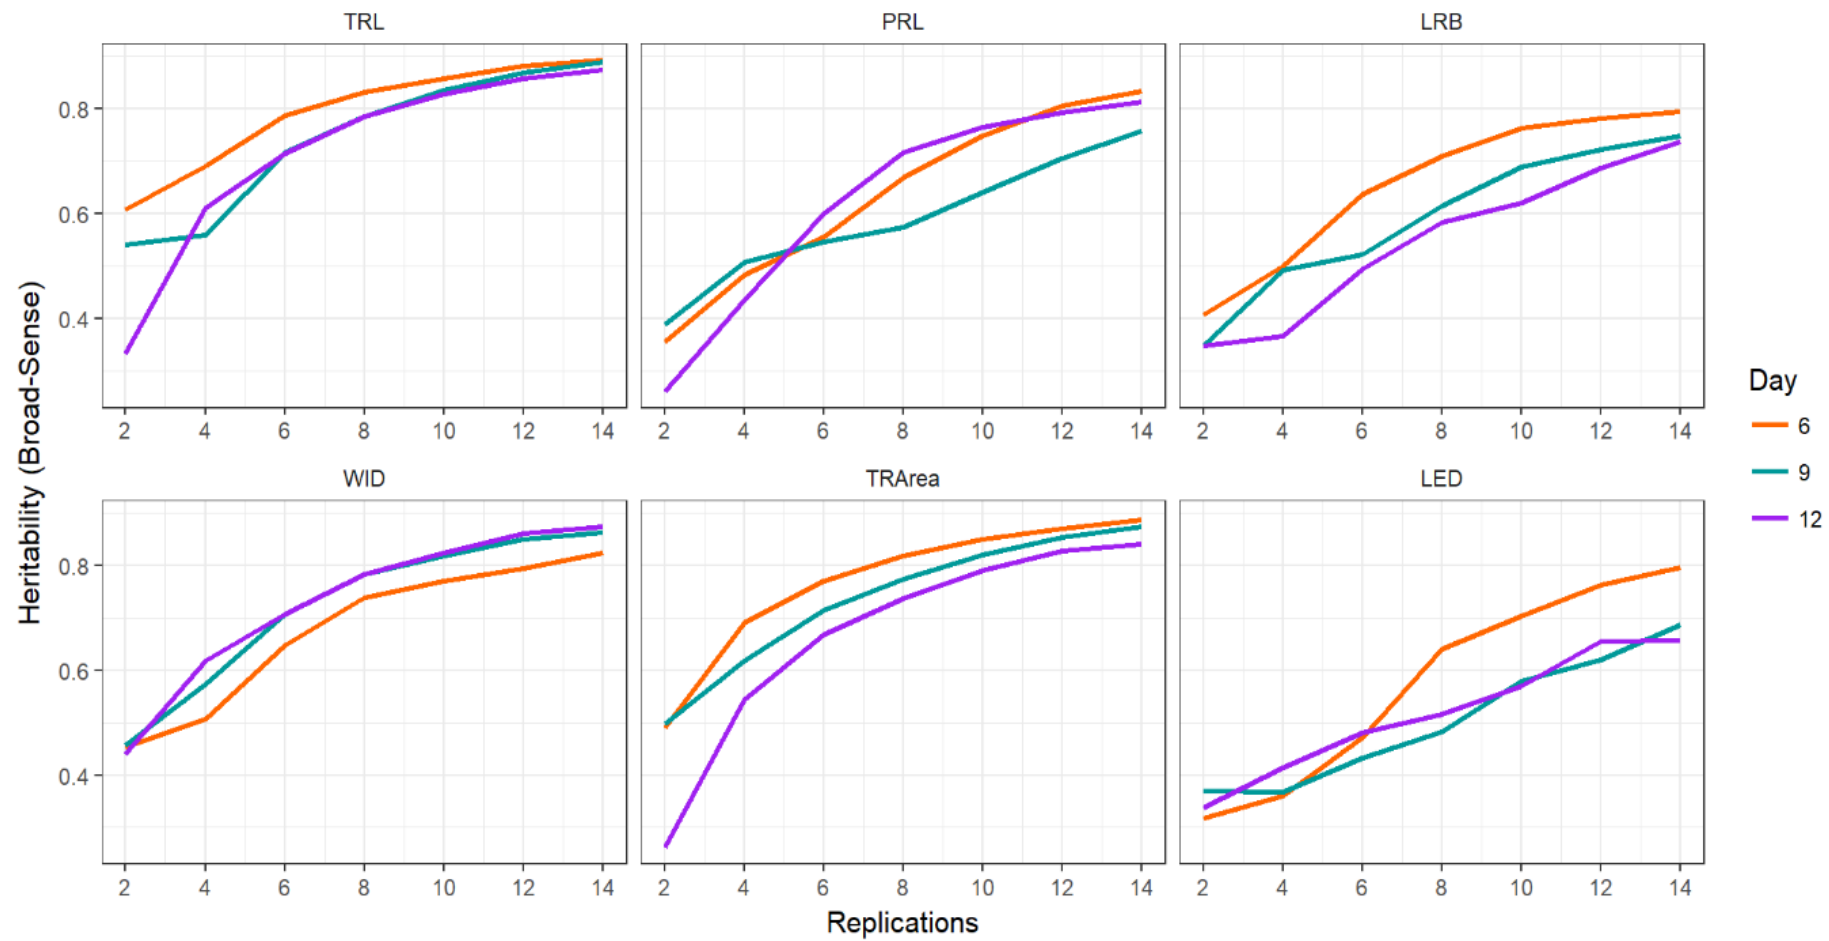

Supplementary Figure 3

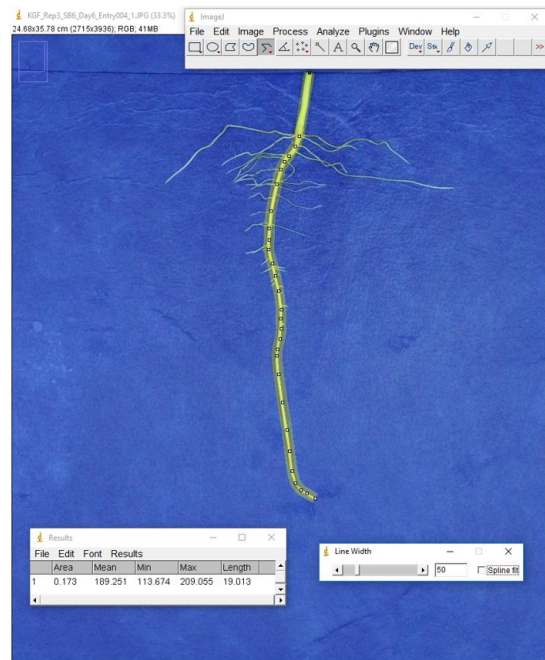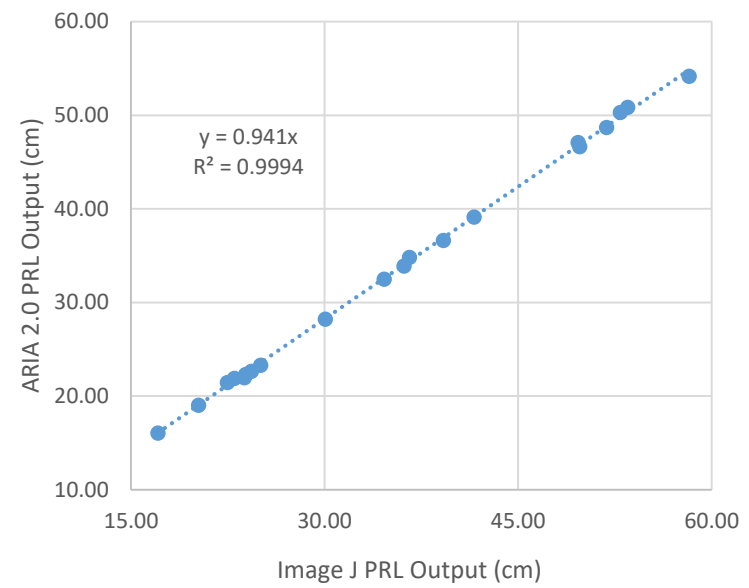

Supplementary Figure 4

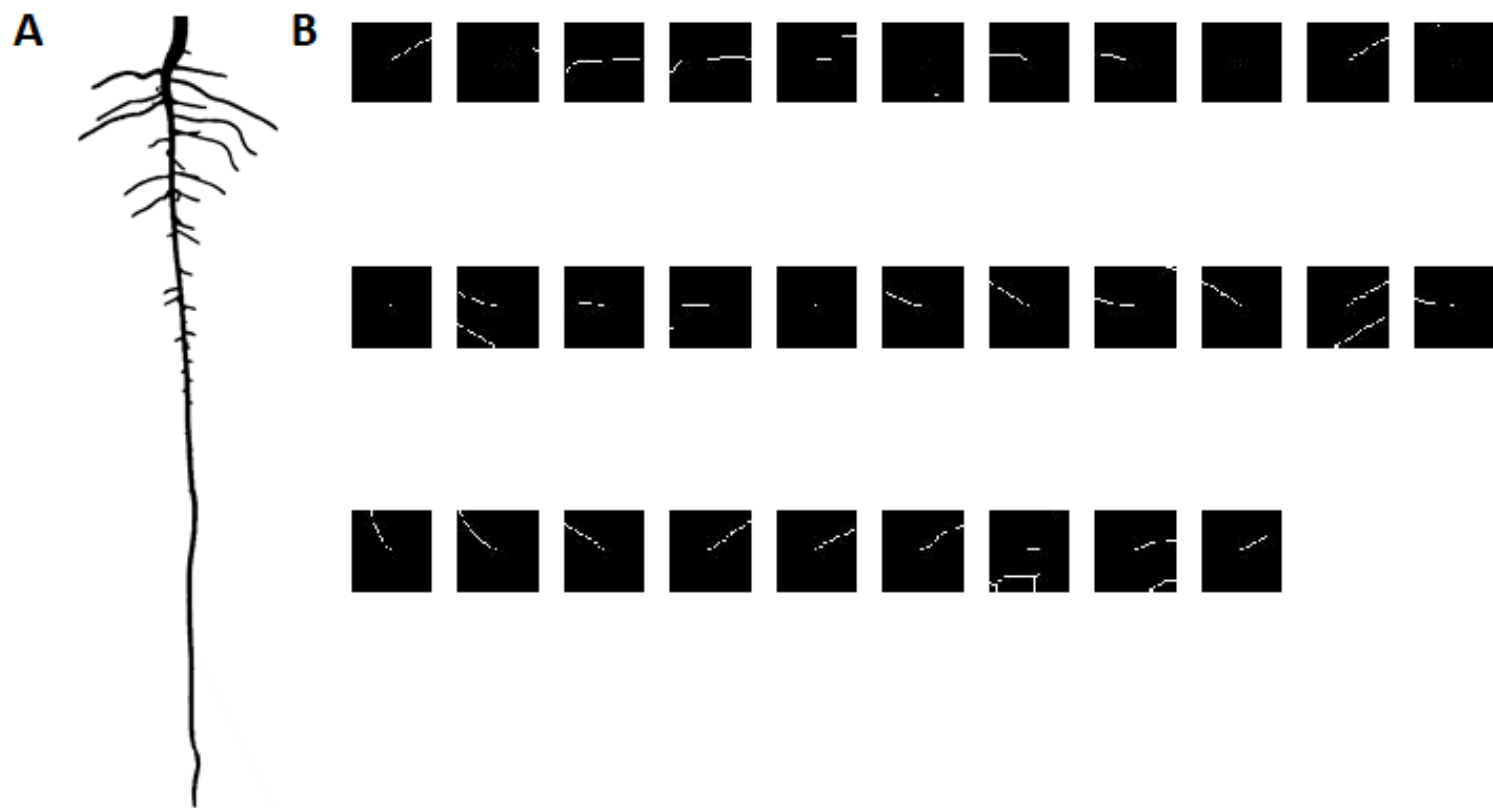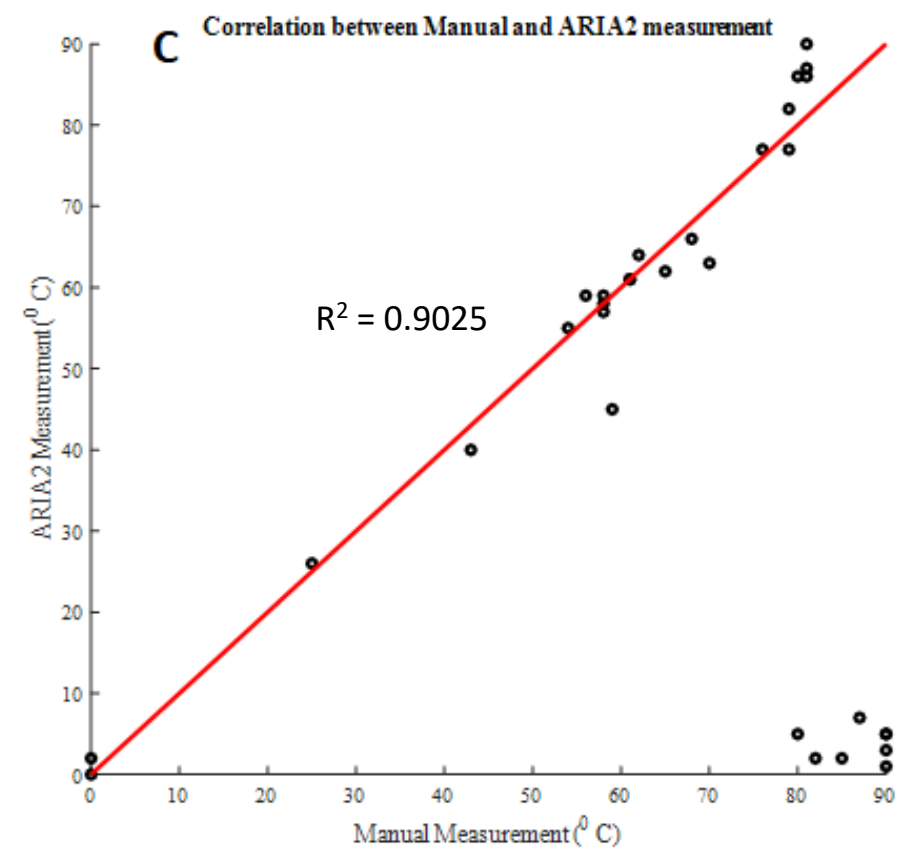

Supplementary Figure 5a, b, c

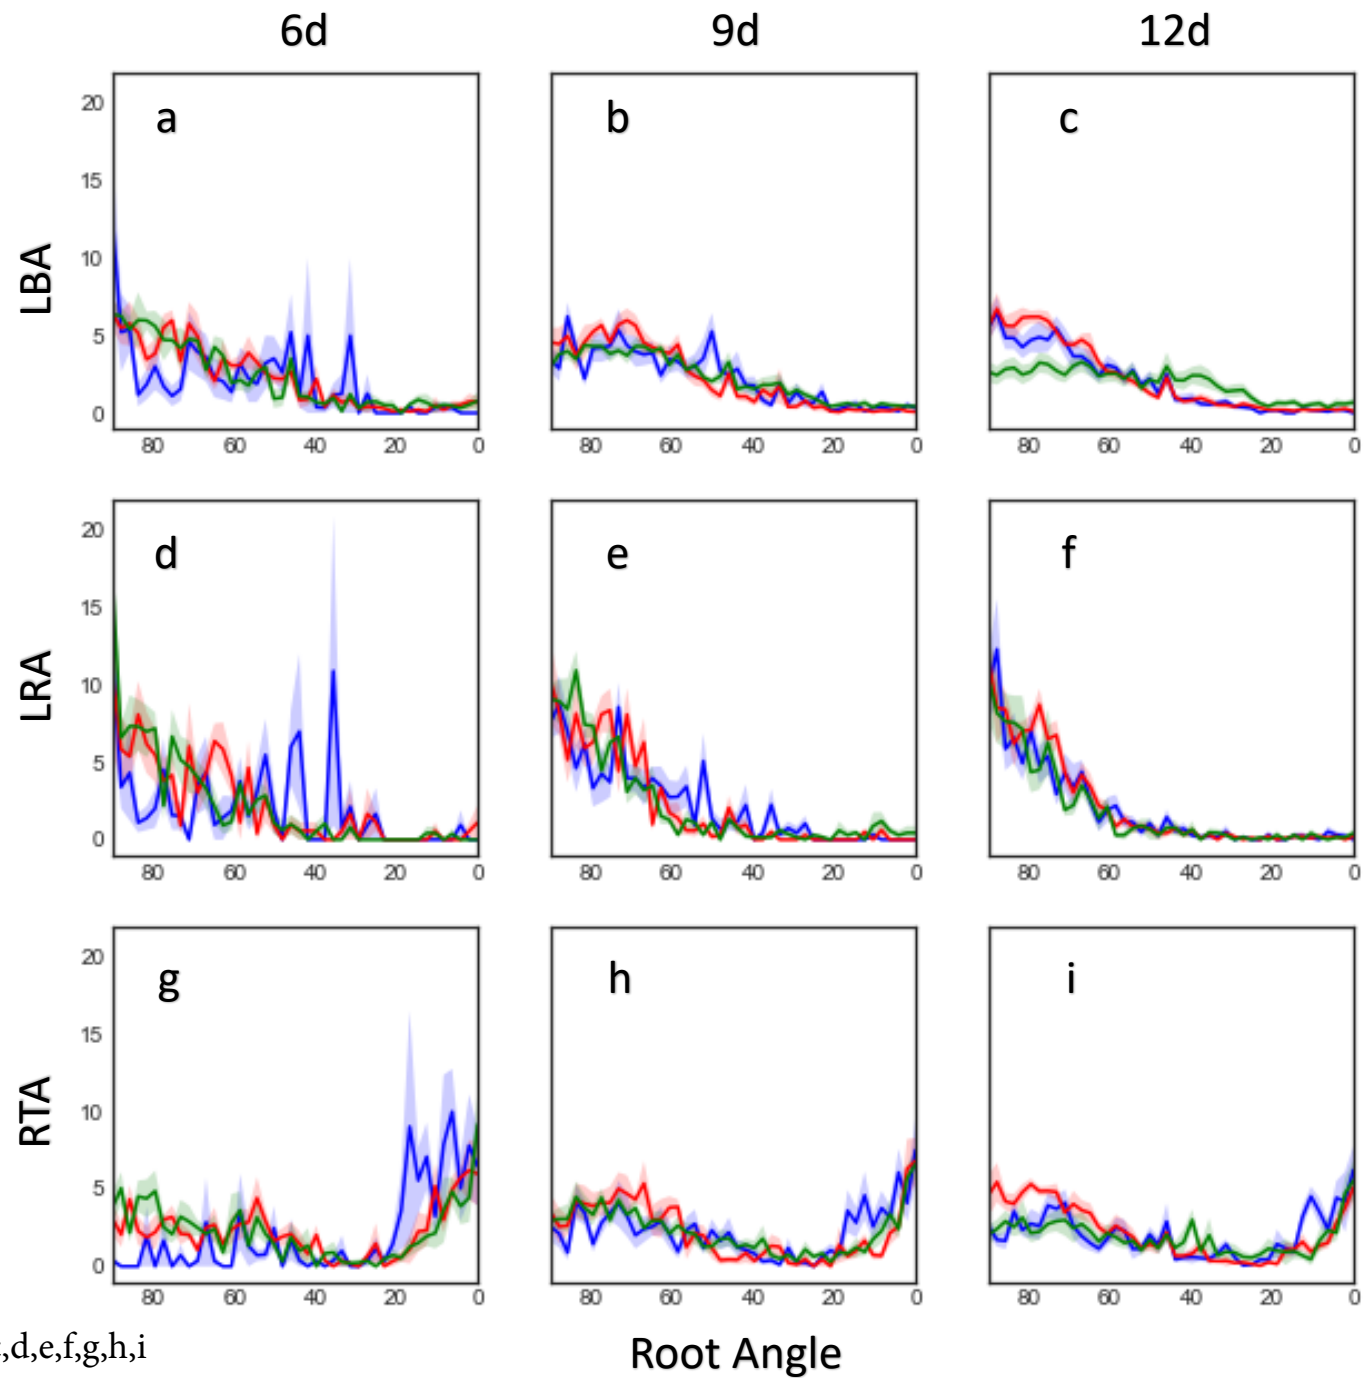

Supplementary Figure 6 a,b,c,d,e,f,g,h,i

Root Angle

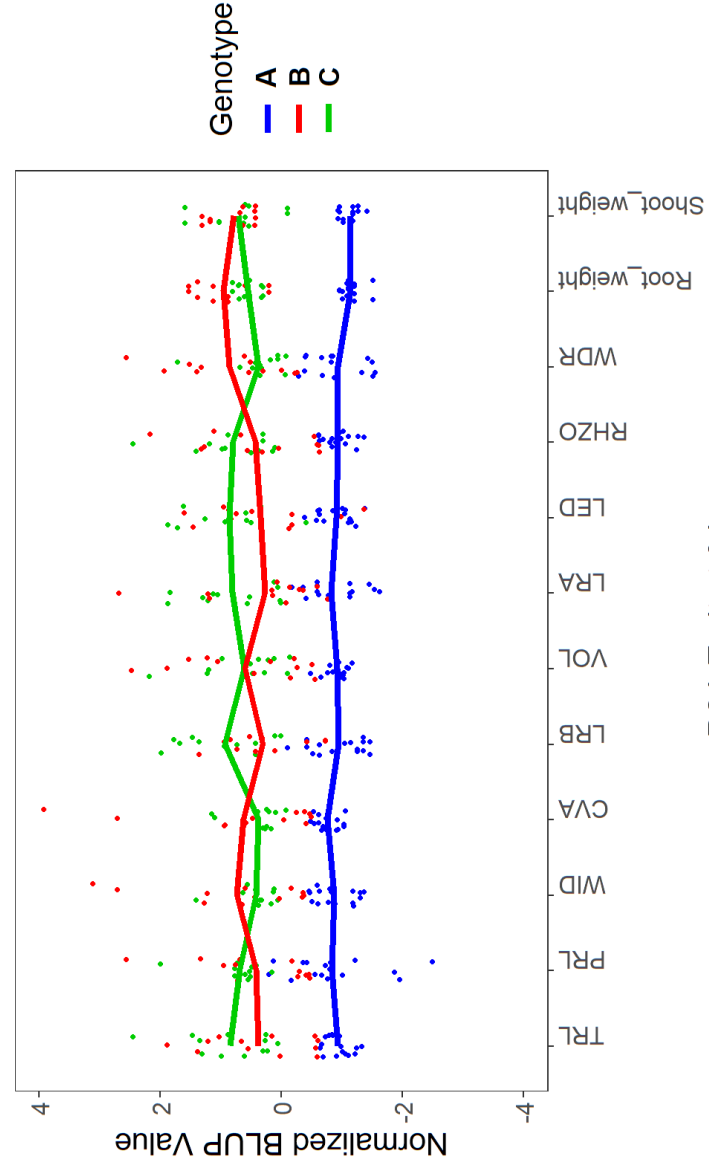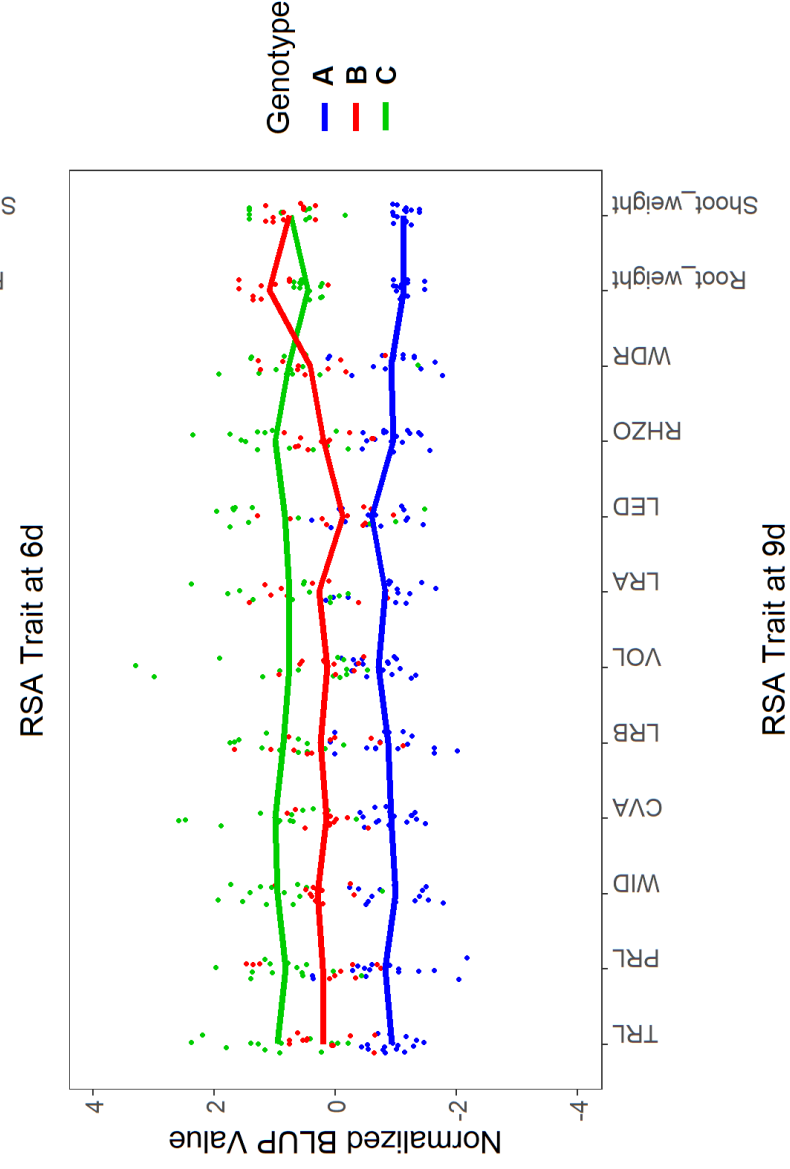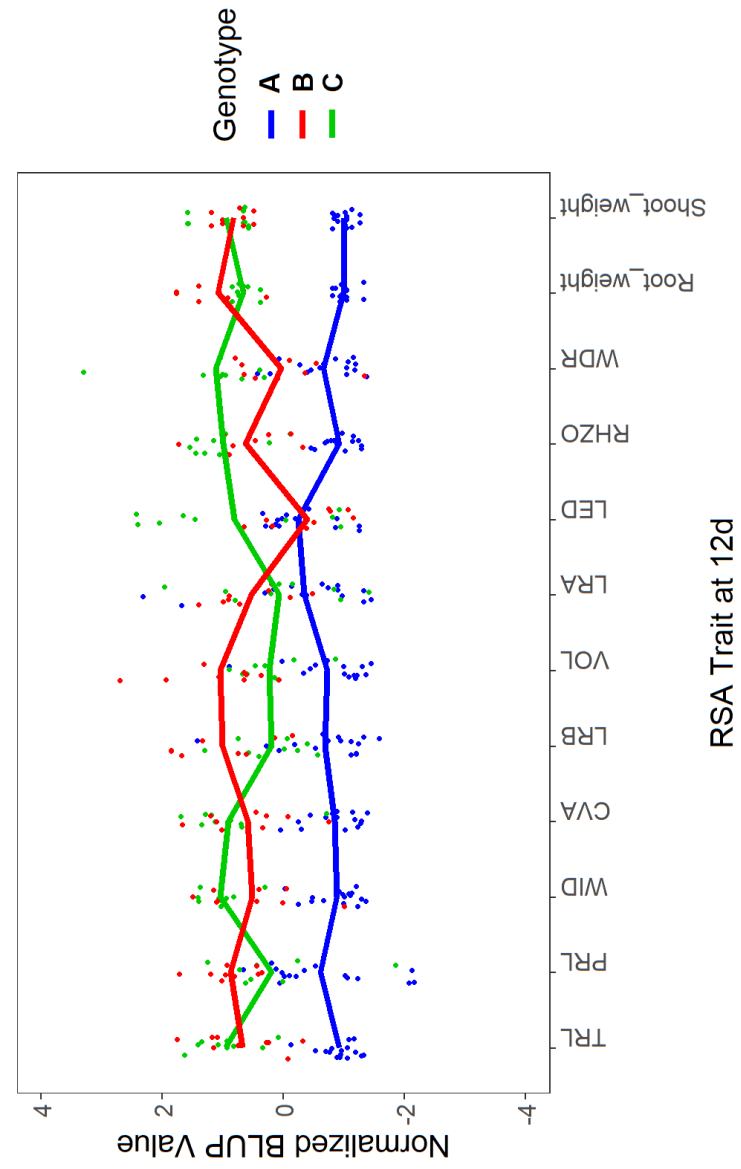

Supplementary Figure 7

Supplementary Figure 8a,b

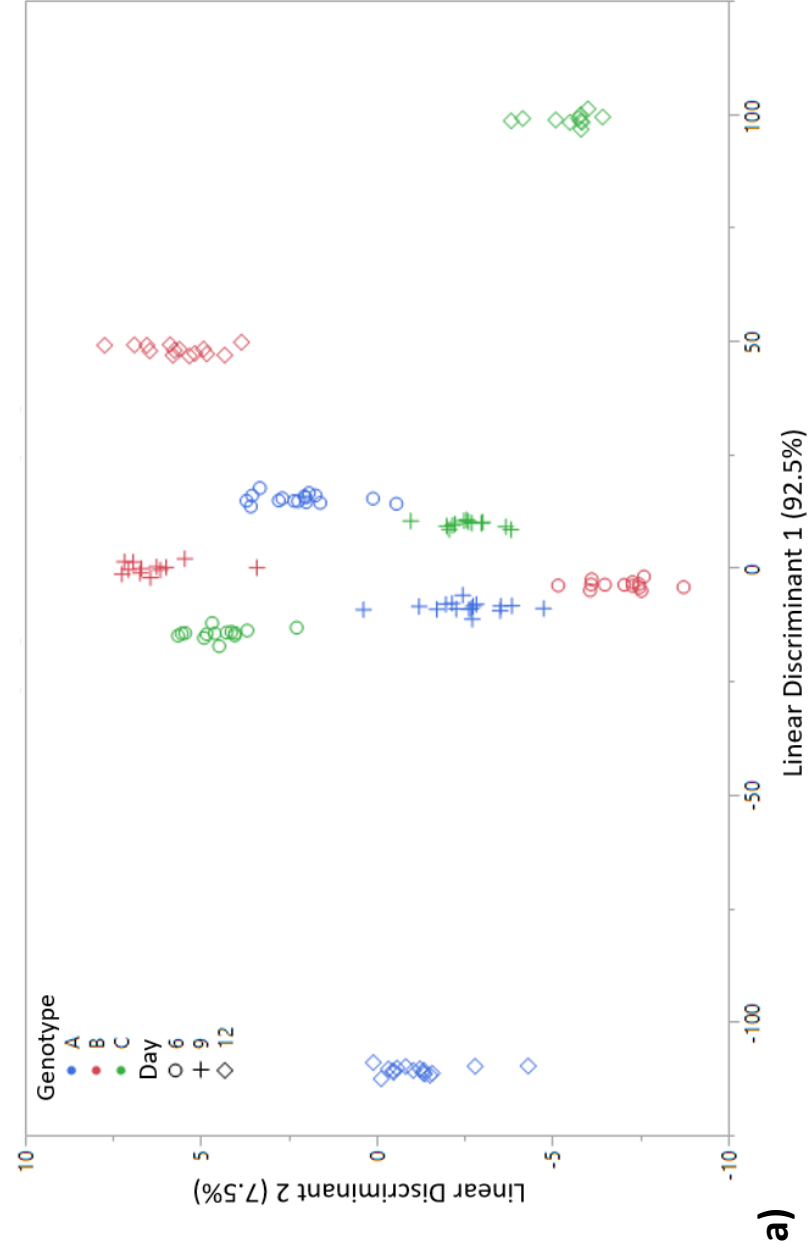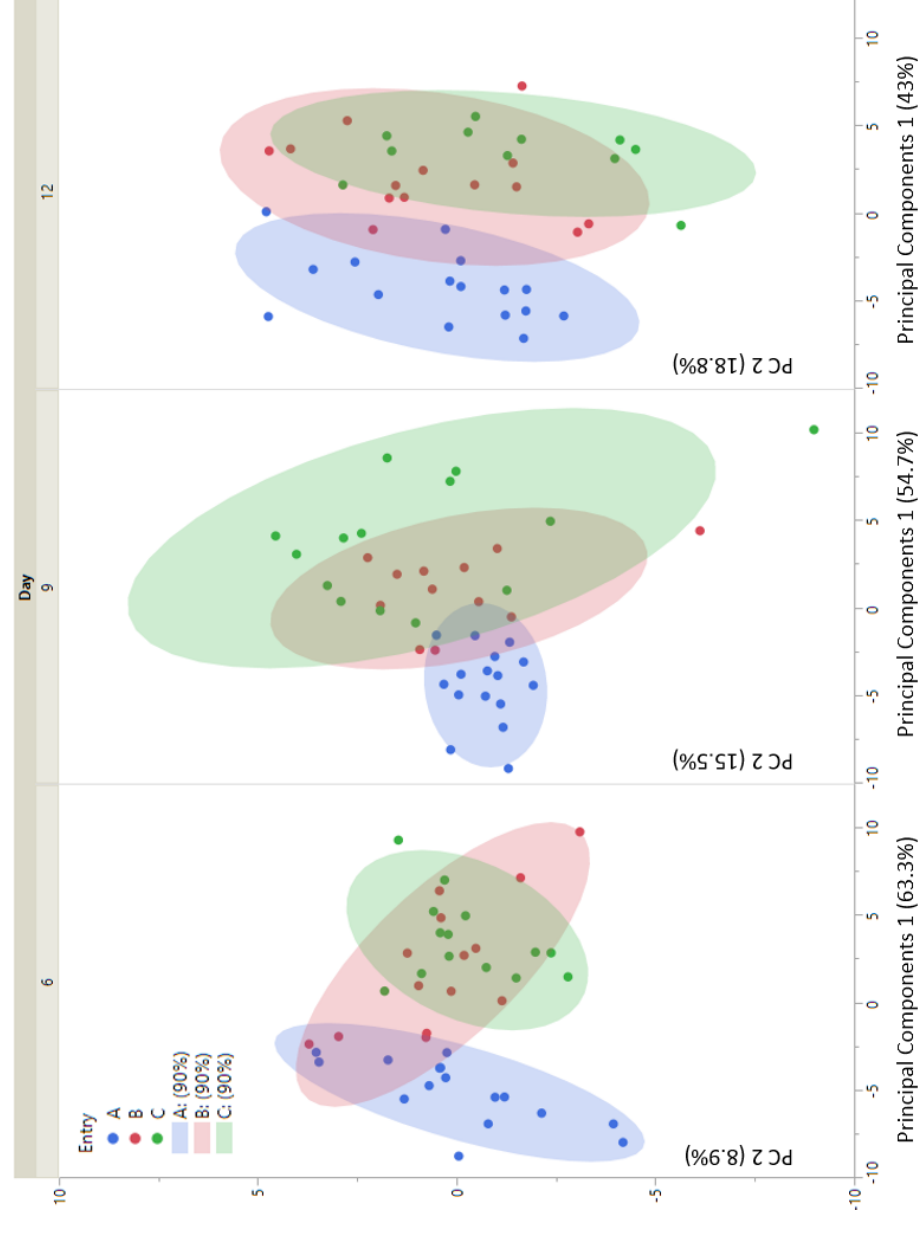

Supplement: 13007_2019_550_MOESM6_ESM.pdf [file 13007_2019_550_MOESM6_ESM.pdf]
